# Supplementary material
Source: PubMed Central journal article supplement (PMC5544588)
Supplement: NIHMS849810-supplement-01.pdf [file NIHMS849810-supplement-01.pdf]

### Supplementary References:

38. Averill RF GN, Hughes JS, Bonazelli J, et al. All Patient Refined Diagnosis Related Groups (APR-DRGs) Version 20.0: Methodology overview. Online July 2003. 3M Health Information Systems. <http://www.hcup-us.ahrq.gov/db/nation/nis/APR-DRGsV20MethodologyOverviewandBibliography.pdf>. Accessed August 24, 2016.
39. Lam PH, Obirieze AC, Ortega G, et al. Characterization of Hepatitis B and C Among Liver Transplant Recipients With Hepatocellular Carcinoma: An Analysis of the Nationwide Inpatient Sample Database. *Transplant Proc.* 2016;48(1):123-7.
40. Moorman AC, Gordon SC, Rupp LB et al. Baseline characteristics and mortality among people in care for chronic viral hepatitis: the chronic hepatitis cohort study. *Clinical Infectious Diseases.* 2012 p. cis815.
41. Mehta AB, Syeda SN, Wiener RS, et al. Epidemiological trends in invasive mechanical ventilation in the United States: A population-based study. *J Crit Care.* 2015;30(6):1217-21.
42. Waikar SS, Wald R, Chertow GM, et al. Validity of International Classification of Diseases, Ninth Revision, Clinical Modification Codes for Acute Renal Failure. *J Am Soc Nephrol.* 2006;17(6):1688-94.
43. Saleh A, Small T, Chandran Pillai AL, et al. Allogenic blood transfusion following total hip arthroplasty: results from the nationwide inpatient sample, 2000 to 2009. *J Bone Joint Surg Am.* 2014;96(18):e155.
44. Guenter P, Holcombe B, Mirtallo JM, et al. Parenteral nutrition utilization: response to drug shortages. *JPEN J Parenter Enteral Nutr.* 2014;38(1):11-2.
45. Martinez-Schlurmann NI, Rampa S, Speicher DG, et al. Prevalence, predictors and outcomes of cardiopulmonary resuscitation in hospitalized adult stem cell transplant recipients in the United States: not just opening the black box but exploring an opportunity to optimize! *Bone Marrow Transplant.* 2015;50(12):1578-81.
46. Ananthakrishnan AN, McGinley EL, Saeian K. Higher hospital volume predicts endoscopy but not the in-hospital mortality rate in patients with acute variceal hemorrhage. *Gastrointest Endosc.* 2009;69(2):221-9.
47. Rajbhandari R, Simon RE, Chung RT, et al. Racial Disparities in Inhospital Outcomes for Hepatocellular Carcinoma in the United States. *Mayo Clin Proc.* 2016

**Supplementary Table 1: International Classification of Diseases, 9<sup>th</sup> Revision, Clinical Modification (ICD-9-CM) Codes Using for Study**

| Diagnostic Category                           | ICD-9-CM codes used                                                                                                                                                                                                                                                                                                |
|-----------------------------------------------|--------------------------------------------------------------------------------------------------------------------------------------------------------------------------------------------------------------------------------------------------------------------------------------------------------------------|
| Decompensated Cirrhosis                       | 571.2, 571.5, 571.6 (cirrhosis codes) + 456.0, 456.20 (esophageal varices with bleeding); 456.1, 456.21 (esophageal varices without bleeding); 789.5, 789.59 (ascites); 572.2 (hepatic coma), 567.0, 567.2, 567.21, 567.21, 567.29, 567.8, 567.89, 567.9 (peritonitis); 572.4 (hepatorenal syndrome) <sup>14</sup> |
| Palliative Care Consultation                  | V66.7 <sup>15,16</sup>                                                                                                                                                                                                                                                                                             |
| Reason for admission                          | CCS Primary diagnosis <sup>12</sup> and APR-DRG codes <sup>38</sup>                                                                                                                                                                                                                                                |
| Presence of Hepatocellular Carcinoma (HCC)    | 155.0 <sup>39</sup>                                                                                                                                                                                                                                                                                                |
| Listed or Received Liver Transplant           | V49.83 <sup>40</sup> (awaiting organ transplant), 505.0, 505.1, 505.9 (received liver transplant) <sup>39</sup>                                                                                                                                                                                                    |
| Mechanical Ventilation                        | 96.04, 96.05, 96.70, 96.71, 96.72 <sup>41</sup>                                                                                                                                                                                                                                                                    |
| Hemodialysis                                  | 584.5, 584.6, 584.7, 584.8, 584.9 (acute renal failure codes) + 39.95, V45.1, V56.0, V56.1 (procedure codes for dialysis), excluding 39.27, 39.42, 39.43, and 39.93 (procedure codes for AV fistula creation or revision) <sup>42</sup>                                                                            |
| Blood Transfusion                             | 99.03, 99.04 <sup>43</sup>                                                                                                                                                                                                                                                                                         |
| Total Parenteral Nutrition                    | 99.15x, 96.6x <sup>44</sup>                                                                                                                                                                                                                                                                                        |
| Cardiopulmonary Resuscitation (CPR)           | 99.6, 99.63 <sup>45</sup>                                                                                                                                                                                                                                                                                          |
| Endoscopy                                     | CCS codes: 70, 76 <sup>12</sup>                                                                                                                                                                                                                                                                                    |
| Paracentesis                                  | CCS codes: 88 <sup>12</sup>                                                                                                                                                                                                                                                                                        |
| Transjugular Intrahepatic Portosystemic Shunt | 39.1 <sup>46</sup>                                                                                                                                                                                                                                                                                                 |
| Blakemore Tube                                | 96.06 <sup>46</sup>                                                                                                                                                                                                                                                                                                |
| Radiofrequency Ablation                       | 50.23-50.26 <sup>47</sup>                                                                                                                                                                                                                                                                                          |
| Trans-arterial Chemoembolization              | 99.25 <sup>47</sup>                                                                                                                                                                                                                                                                                                |

**Supplementary Table 3: Sensitivity Analyses Exploring Non-Transplant Candidates and Adjustment Using Doubly Robust Inverse Probability Treatment Weighted (IPTW) Analysis**

| <b>Sensitivity Analysis</b> | <b>Dataset</b>   | <b>Effect of Palliative Care on Cost</b> | <b>95% Confidence Interval</b> |
|-----------------------------|------------------|------------------------------------------|--------------------------------|
| Non-Transplant Candidates   | All data         | -7,111                                   | (-10,242, -5,179)              |
| IPTW Analysis               | Non-imputed Data | -10,000                                  | (-12,319, -7,683)              |
|                             | Imputation # 1   | -9,712                                   | (-11,967, -7,456)              |
|                             | Imputation # 2   | -9,561                                   | (-11,885, -7,267)              |
|                             | Imputation # 3   | -9,736                                   | (-11,984, -7,487)              |
|                             | Imputation # 4   | -9,692                                   | (-11,945, -7,439)              |
|                             | Imputation # 5   | -9,694                                   | (-11,941, -7,445)              |
|                             | Mean             | -9,773                                   |                                |

|                                            | <b>Small Urban,<br/>Non-teaching</b> | <b>Small Urban,<br/>teaching</b> | <b>Medium, Urban<br/>Non-Teaching</b> | <b>Medium, Urban<br/>Teaching</b> | <b>Large Rural</b>      | <b>Large Urban<br/>Non-Teaching</b> | <b>Large Urban<br/>Teaching</b> |
|--------------------------------------------|--------------------------------------|----------------------------------|---------------------------------------|-----------------------------------|-------------------------|-------------------------------------|---------------------------------|
| Patients, N (% receiving palliative care)* | 1,767 (18.3%)                        | 3,068 (24.9%)                    | 4,832 (22.2%)                         | 7,693 (29.4%)                     | 2,751 (23.6%)           | 13,006 (28.5%)                      | 25,700 (32.5%)                  |
| <b>Female</b>                              | 0.95 (0.52-1.72)                     | 1.19 (0.82-1.74)                 | 1.08 (0.79-1.48)                      | <b>0.77 (0.61-0.99)</b>           | 0.82 (0.54-1.24)        | 1.17 (0.98-1.39)                    | 1.02 (0.91-1.15)                |
| <b>Race</b>                                |                                      |                                  |                                       |                                   |                         |                                     |                                 |
| Caucasian                                  | Reference                            | Reference                        | Reference                             | Reference                         | Reference               | Reference                           | Reference                       |
| African American                           | 0                                    | <b>0.44 (0.21-0.92)</b>          | 0.51 (0.23-1.12)                      | <b>0.65 (0.44-0.95)</b>           | 0.80 (0.33-1.97)        | 0.99 (0.70-1.39)                    | <b>0.72 (0.58-0.90)</b>         |
| Hispanic                                   | 0.36 (0.11-1.16)                     | 1.01 (0.59-1.71)                 | 0.92 (0.55-1.56)                      | 0.78 (0.44-1.09)                  | 0.42 (0.15-1.24)        | 0.85 (0.64-1.13)                    | 0.86 (0.66-1.11)                |
| Asian                                      | 0.26 (0.04-1.82)                     | 1.20 (0.47-3.20)                 | 0.79 (0.21-3.00)                      | 0.71 (0.31-1.63)                  | **                      | 1.09 (0.60-1.95)                    | 0.82 (0.53-1.26)                |
| Native American                            | 3.97 (0.85-18.7)                     | **                               | **                                    | <b>3.41 (1.23-9.50)</b>           | 0.56 (0.13-2.50)        | 2.18 (0.89-5.27)                    | <b>1.90 (1.02-3.55)</b>         |
| Other                                      | 0.63 (0.12-3.32)                     | 0.49 (0.12-1.89)                 | 1.26 (0.51-3.12)                      | 0.81 (0.41-1.64)                  | 2.72 (0.67-11.0)        | 1.00 (0.61-1.64)                    | 0.80 (0.56-1.14)                |
| <b>Insurance Status</b>                    |                                      |                                  |                                       |                                   |                         |                                     |                                 |
| Medicare (%)                               | Reference                            | Reference                        | Reference                             | Reference                         | Reference               | Reference                           | Reference                       |
| Medicaid (%)                               | 1.25 (0.43-3.70)                     | 1.82 (0.98-3.35)                 | 0.73 (0.46-1.14)                      | 1.06 (0.74-1.50)                  | 1.01 (0.50-2.02)        | 1.22 (0.94-1.60)                    | 1.00 (0.83-1.21)                |
| Private (%)                                | 0.87 (0.40-1.91)                     | 1.29 (0.74-2.13)                 | 0.94 (0.62-1.42)                      | 1.08 (0.76-1.53)                  | <b>1.97 (1.09-3.59)</b> | 1.24 (0.98-1.58)                    | 1.02 (0.86-1.22)                |
| Self-pay (%)                               | 1.08 (0.275-4.26)                    | 1.14 (0.49-2.64)                 | 0.68 (0.35-1.32)                      | 1.09 (0.68-1.73)                  | 0.83 (0.28-2.47)        | 1.19 (0.84-1.69)                    | 1.06 (0.80-1.39)                |
| No charge (%)                              | **                                   | **                               | **                                    | <b>3.41 (1.23-9.50)</b>           | **                      | 1.30 (0.48-3.55)                    | 1.34 (0.57-3.13)                |
| Other (%)                                  | 0.49 (0.09-2.61)                     | 1.49 (0.67-3.29)                 | 0.68 (0.30-1.55)                      | <b>1.86 (1.10-3.13)</b>           | 1.05 (0.33-3.35)        | <b>1.67 (1.02-2.72)</b>             | 0.97 (0.69-1.37)                |
| <b>Age</b>                                 | 1.02 (0.99-1.05)                     | 1.00 (0.98-1.02)                 | 0.99 (0.98-1.01)                      | 1.01 (0.99-1.02)                  | 1.00 (0.99-1.03)        | 1.00 (0.99-1.00)                    | 1.00 (1.00-1.01)                |
| <b>Annual Household Income</b>             |                                      |                                  |                                       |                                   |                         |                                     |                                 |

|                                                  |                   |                          |                         |                         |                         |                         |                         |
|--------------------------------------------------|-------------------|--------------------------|-------------------------|-------------------------|-------------------------|-------------------------|-------------------------|
| 0-25 <sup>th</sup> Percentile                    | Reference         | Reference                | Reference               | Reference               | Reference               | Reference               | Reference               |
| 25 <sup>th</sup> -50 <sup>th</sup> Percentile    | 1.23 (0.44-3.48)  | 0.82 (0.44-1.52)         | 0.87 (0.48-1.58)        | 1.22 (0.90-1.66)        | 1.27 (0.73-2.23)        | 1.21 (0.92-1.58)        | 1.03 (0.87-1.23)        |
| 50-75 <sup>th</sup> Percentile                   | 1.35 (0.504-3.63) | 1.29 (0.71-2.32)         | 1.59 (0.92-2.77)        | 0.90 (0.65-1.26)        | <b>2.14 (1.07-4.26)</b> | 1.22 (0.88-1.68)        | 1.07 (0.87-1.30)        |
| 75 <sup>th</sup> -100 <sup>th</sup> Percentile   | 2.25 (0.84-6.03)  | 1.15 (0.63-2.10)         | 1.34 (0.74-2.43)        | 0.80 (0.56-1.15)        | 1.47 (0.38-5.64)        | <b>1.56 (1.13-2.16)</b> | 1.05 (0.84-1.32)        |
| <b>Charlson comorbidity index</b>                | 0.98 (0.84-1.15)  | 1.06 (0.98-1.15)         | 1.02 (0.96-1.08)        | 1.03 (0.98-1.08)        | 0.95 (0.85-1.05)        | 1.02 (0.98-1.06)        | <b>1.04 (1.01-1.07)</b> |
| <b>Hepatocellular Carcinoma (%)</b>              | 1.50 (0.46-4.93)  | 0.71 (0.30-1.69)         | 1.42 (0.71-2.87)        | 1.24 (0.83-1.86)        | <b>3.25 (1.24-8.53)</b> | <b>1.91 (1.32-2.77)</b> | <b>1.34 (1.06-1.69)</b> |
| <b>Awaiting or Received Liver Transplant (%)</b> | **                | 2.11 (0.43-10.2)         | **                      | 0.52 (0.17-1.63)        | 6.42 (0.79-52.3)        | 0.53 (0.11-2.66)        | 0.73 (0.52-1.04)        |
| <b>Year</b>                                      |                   |                          |                         |                         |                         |                         |                         |
| 2009                                             | Reference         | Reference                | Reference               | Reference               | Reference               | Reference               | Reference               |
| 2010                                             | 1.99 (0.59-6.73)  | <b>3.02 (1.11-8.17)</b>  | 0.95 (0.42-2.17)        | <b>2.16 (1.14-4.09)</b> | 1.84 (0.76-4.47)        | 1.27 (0.79-2.03)        | <b>1.81 (1.23-2.67)</b> |
| 2011                                             | 0.58 (0.18-1.87)  | <b>4.85 (1.78-13.33)</b> | <b>2.03 (1.11-3.71)</b> | <b>2.25 (1.21-4.22)</b> | 1.02 (0.40-2.66)        | <b>1.93 (1.28-2.92)</b> | <b>2.26 (1.35-3.74)</b> |
| 2012                                             | 1.97 (0.74-5.22)  | <b>4.31 (1.70-10.91)</b> | <b>2.05 (1.07-3.97)</b> | <b>2.14 (1.90-3.87)</b> | <b>2.31 (1.01-5.28)</b> | <b>1.71 (1.11-2.62)</b> | <b>2.94 (1.97-4.37)</b> |
| 2013                                             | 1.47 (0.49-4.39)  | <b>6.82 (2.82-16.78)</b> | <b>2.45 (1.25-4.81)</b> | <b>1.90 (1.05-3.44)</b> | <b>2.66 (1.13-6.23)</b> | <b>2.00 (1.32-3.03)</b> | <b>3.00 (2.04-4.39)</b> |

\* Small rural hospitals (N=170, 18.1%) and medium rural hospitals (N=483, 30.1%) not included due to small numbers of all data elements.

\*\* Few (<10) or no patients found in hospital sub-sample

### Supplementary Table 2: Receipt of Palliative Care Consultation, Stratified by Hospital Factors
